# Supplementary material for: Realizing low-ion-migration and highly sensitive X-ray detection by building g-C3N4 and CH3NH3PbI3 bulk heterojunction pellets
Source: Royal Society of Chemistry journal article supplement (doi:10.1039/d3ta05555h), 2023-01-01
Supplement: d3ta05555h1.pdf [file d3ta05555h1.pdf]

## Support Information

### **Realizing low ion migration and highly sensitive X-ray detection by building $g\text{-C}_3\text{N}_4$ and $\text{CH}_3\text{NH}_3\text{PbI}_3$ bulk heterojunction pellets**

Chengzhi Xue,<sup>a</sup> Yingrui Xiao,<sup>a</sup> Xing Liu,<sup>a</sup> Ziwei Xu,<sup>a</sup> Nan Li,<sup>a</sup> Shubo Wang,<sup>c</sup> Ningyi Yuan,<sup>d</sup> Jianding Ding,<sup>e</sup> Xu Guo,<sup>\*a</sup> Zhou Yang,<sup>\*a</sup> and Shengzhong (Frank) Liu,<sup>\*ab</sup>

- a. Key Laboratory of Applied Surface and Colloid Chemistry, Ministry of Education; Shaanxi Key Laboratory for Advanced Energy Devices; Shaanxi Engineering Lab for Advanced Energy Technology; Institute for Advanced Energy Materials; School of Materials Science and Engineering, Shaanxi Normal University, Xi'an 710119, China. Email: szliu@dicp.ac.cn; zyang@snnu.edu.cn; guoxu@snnu.edu.cn
- b. Dalian National Laboratory for Clean Energy; Dalian Institute of Chemical Physics, Chinese Academy of Sciences, Dalian116023, China
- c. School of Chemical Engineering and Materials, Changzhou Institute of Technology, Changzhou, 213032 China
- d. School of Materials Science and Engineering, Jiangsu Collaborative Innovation Center for Photovoltaic Science and Engineering, Jiangsu Province Cultivation Base for State Key Laboratory of Photovoltaic Science and Technology, Changzhou University, Changzhou, 213164 China
- e. Micro/Nano Science and Technology Center, Jiangsu University, Zhenjiang, 212013 China

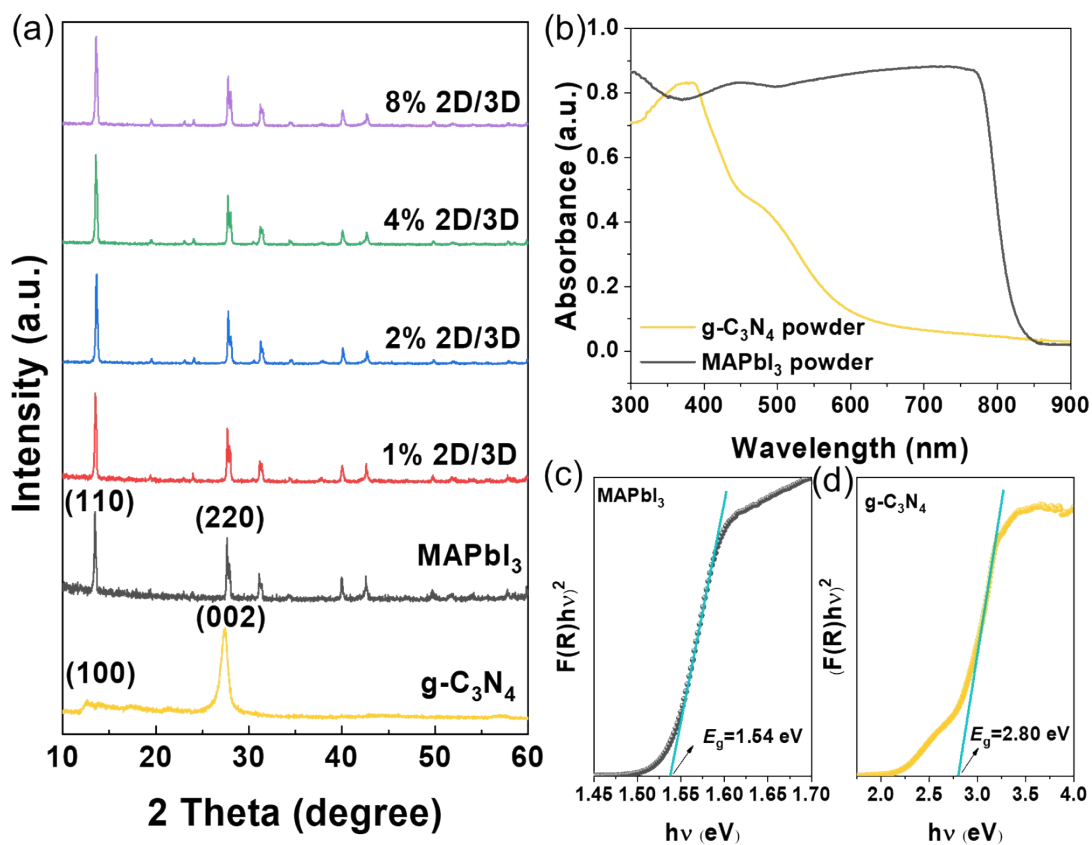

**Fig. S1.** (a) *g*-C<sub>3</sub>N<sub>4</sub>, MAPbI<sub>3</sub> powders and XRD diffractogram patterns of 2D/3D wafers. (b) UV-Vis absorption spectra of MAPbI<sub>3</sub> and *g*-C<sub>3</sub>N<sub>4</sub>. Band gap energy calculation (Tauc plots) (c) MAPbI<sub>3</sub>, and (d) *g*-C<sub>3</sub>N<sub>4</sub>.

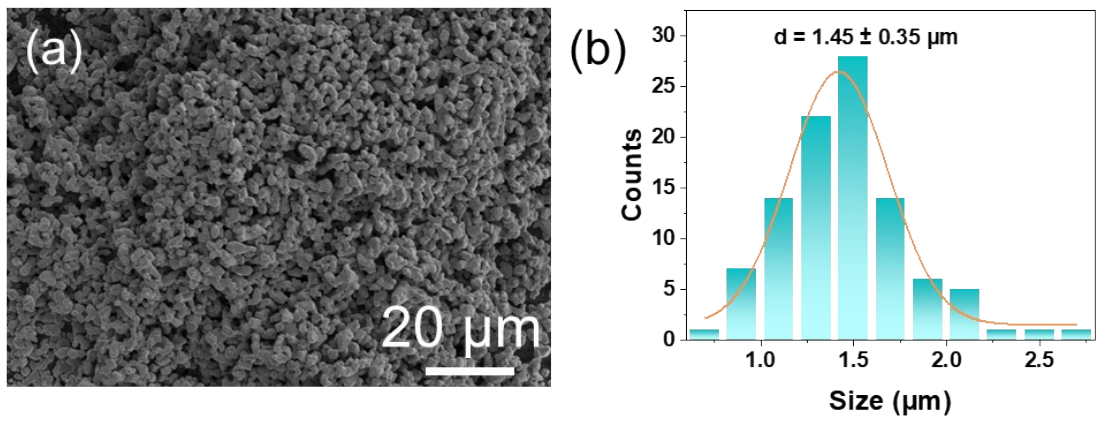

**Fig. S2.** (a) Scanning electron microscopy (SEM) images of the MAPbI<sub>3</sub> powder. (b) Grain size statistic of MAPbI<sub>3</sub> powders.

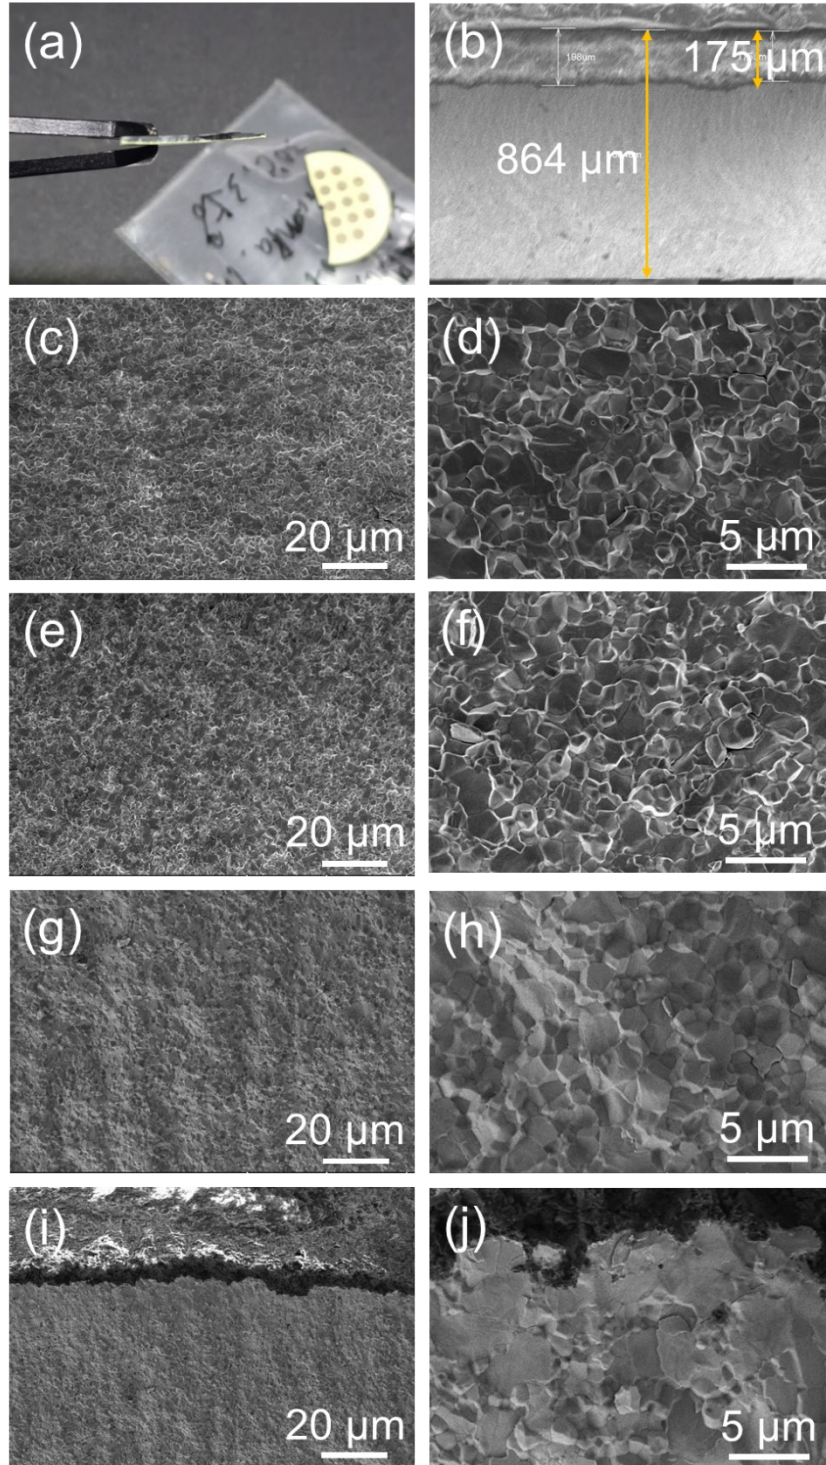

**Fig. S3.** Microstructure of perovskite and  $g\text{-C}_3\text{N}_4$  double-layer wafer. (a, b) The cross-sectional thickness of the double-layer wafer and position of morphological enlargement. (c, d) Microstructure of the bottom of the perovskite layer. (e, f) Microstructure of the middle of the perovskite layer. (g, h) Microstructure of the top of the perovskite layer. (i, j) Microstructure between the perovskite layer and the  $g\text{-C}_3\text{N}_4$  layer.

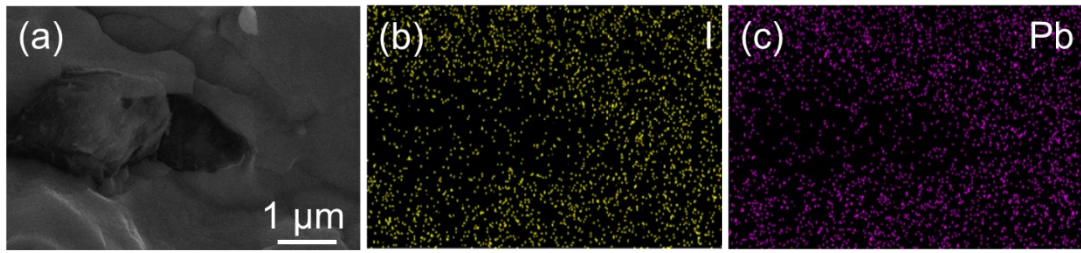

**Fig. S4.** Micro-regional elemental analysis of wafer cross-sections (a) Picture. Elemental distributions (b) I, and (c) Pb elements.

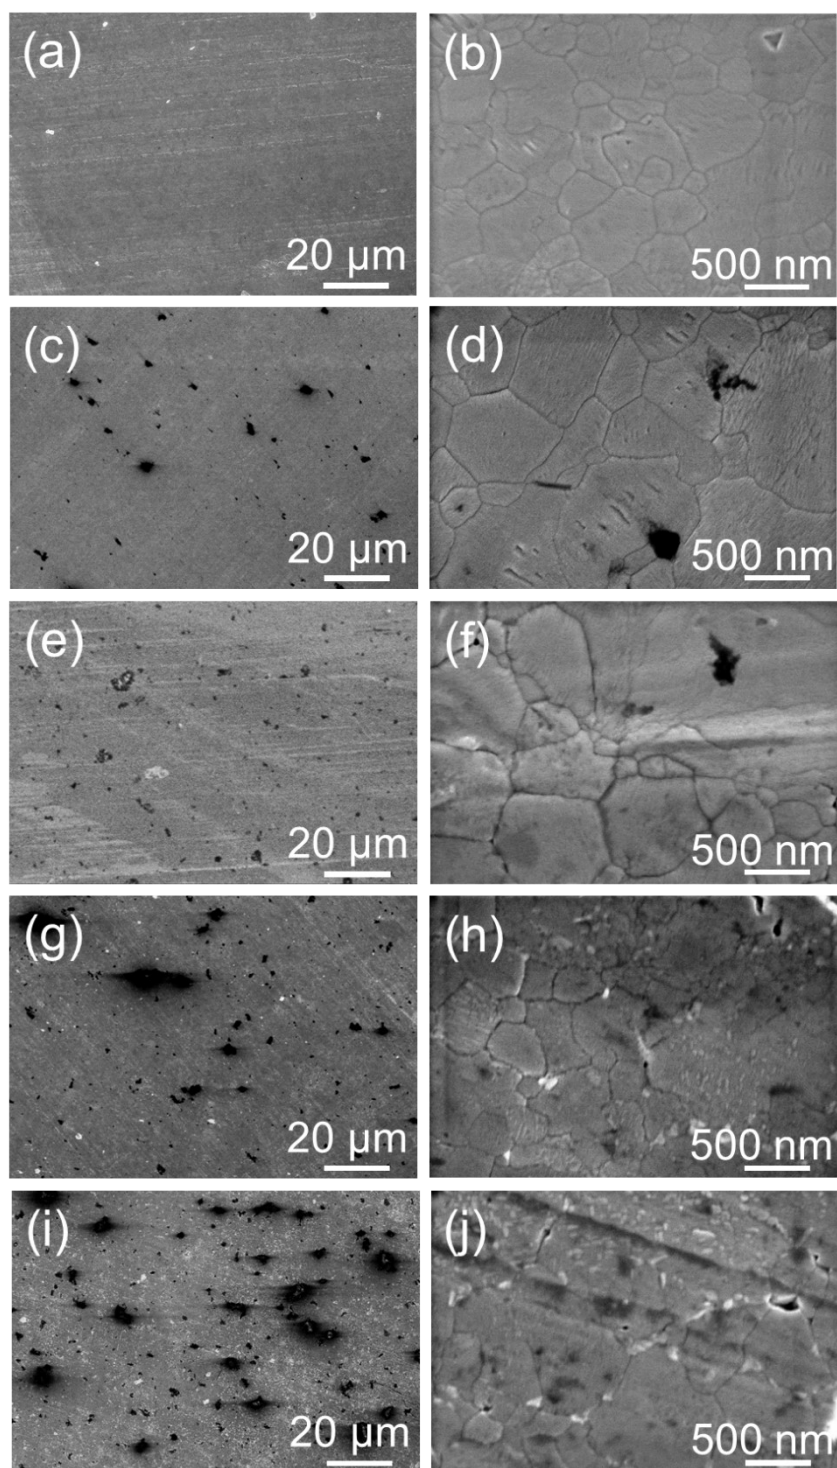

**Fig. S5.** The plane microstructure of the pellets. Scanning electron microscopy (SEM) images of the pristine 3D pellet (a, b), 1% 2D/3D pellet (c, d), 2% 2D/3D pellet (e, f), 4% 2D/3D pellet (g, h), and 8% 2D/3D pellet (i, j).

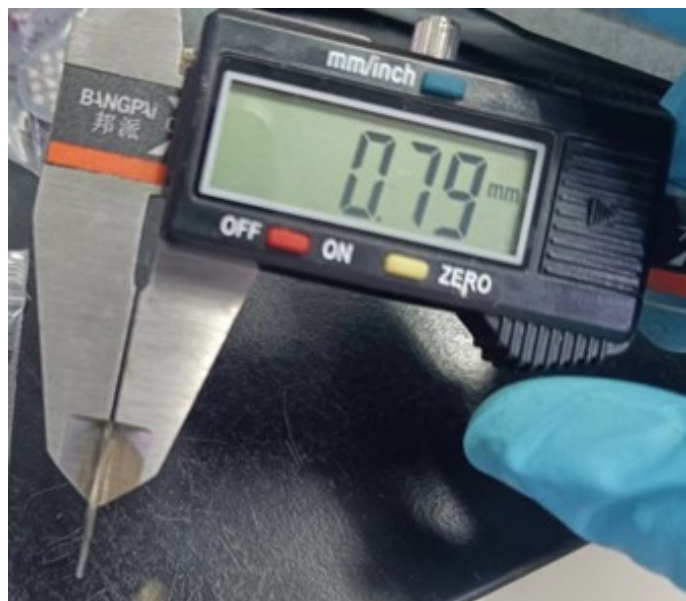

**Fig. S6.** Schematic diagram of wafer thickness.

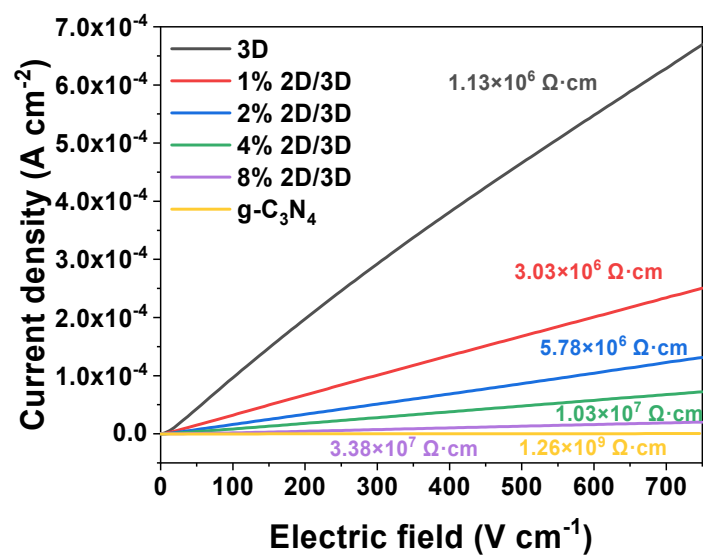

Fig. S7. Resistivities of 3D, 2D and 2D/3D wafers.



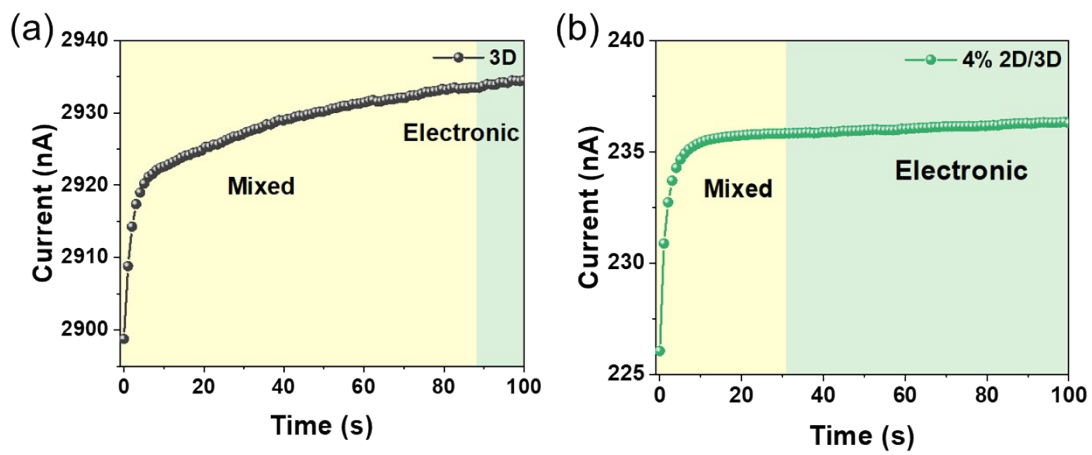

**Fig. S8.** Current time profile on the wafers at the beginning of the phase. Applying a voltage of 10 V. (a) 3D. (b) 4% 2D/3D. The mixed region in the diagram refers to the coexistence of both ionic and electronic conductivity. The electron region is where electron conductivity is dominant.

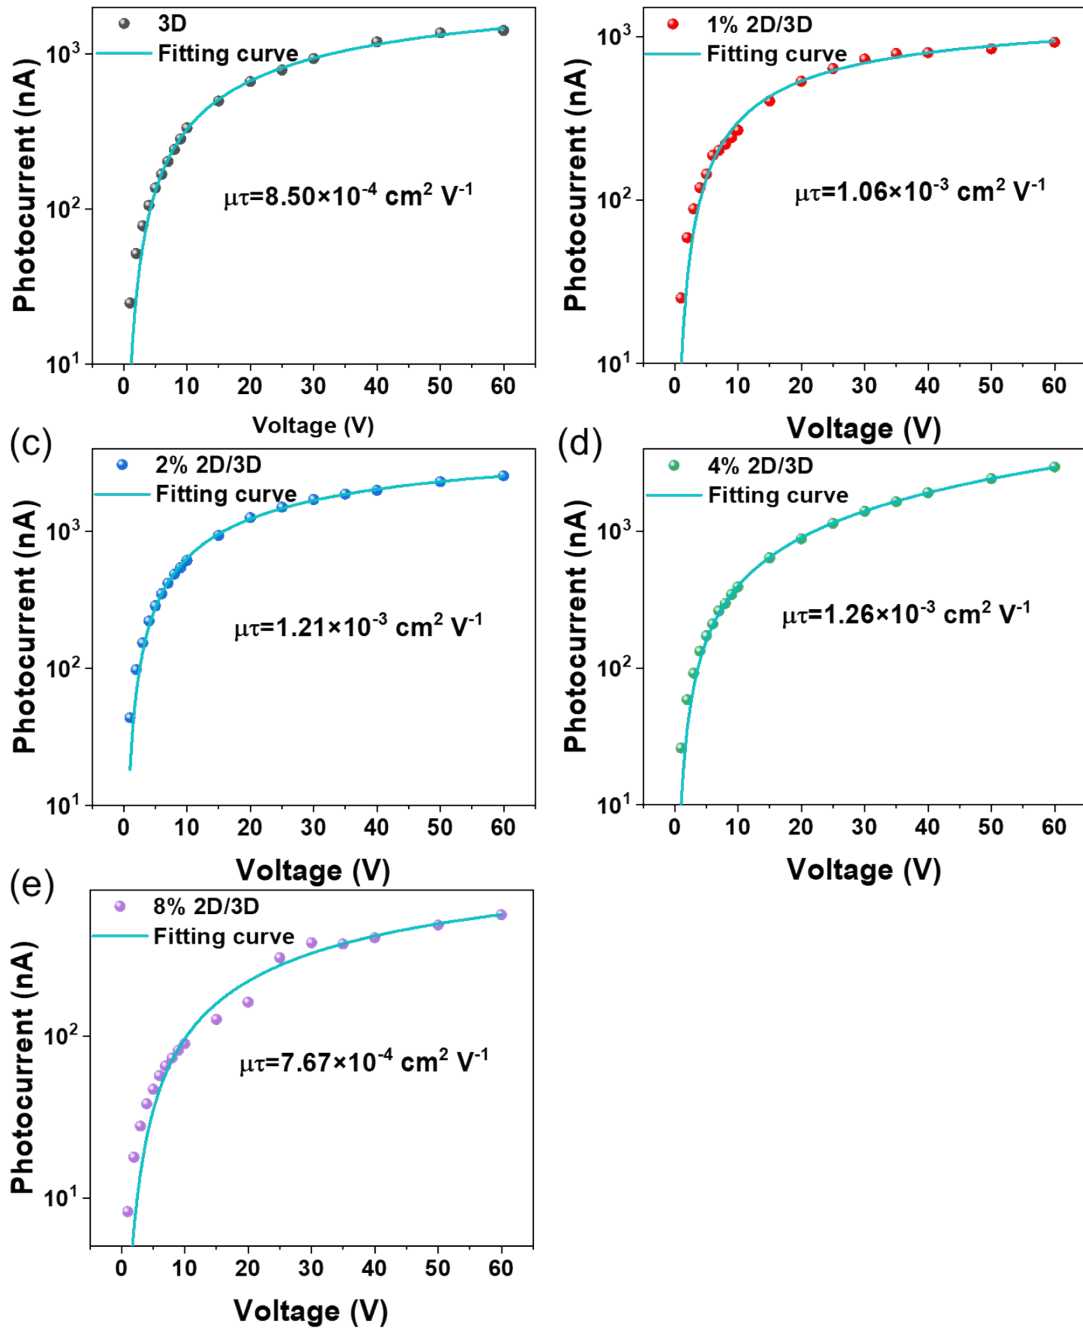

Fig. S9. Photoconductivity of 3D and 2D/3D wafers. Fitting lines for the  $\mu\tau$  product were shown.

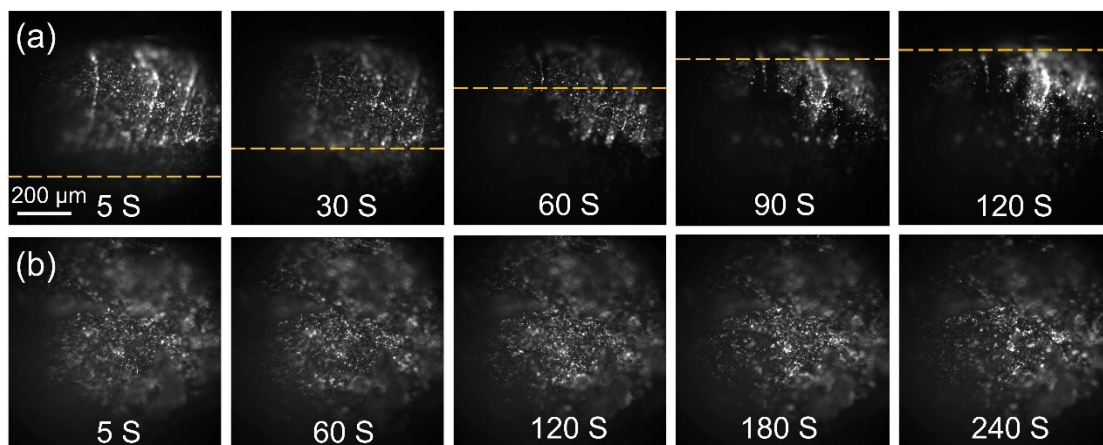

**Fig. S10.** The time-dependent PL mapping of (a) 3D wafer and (b) 4% 2D/3D wafer under 40 V bias and excitation of 405 nm laser.

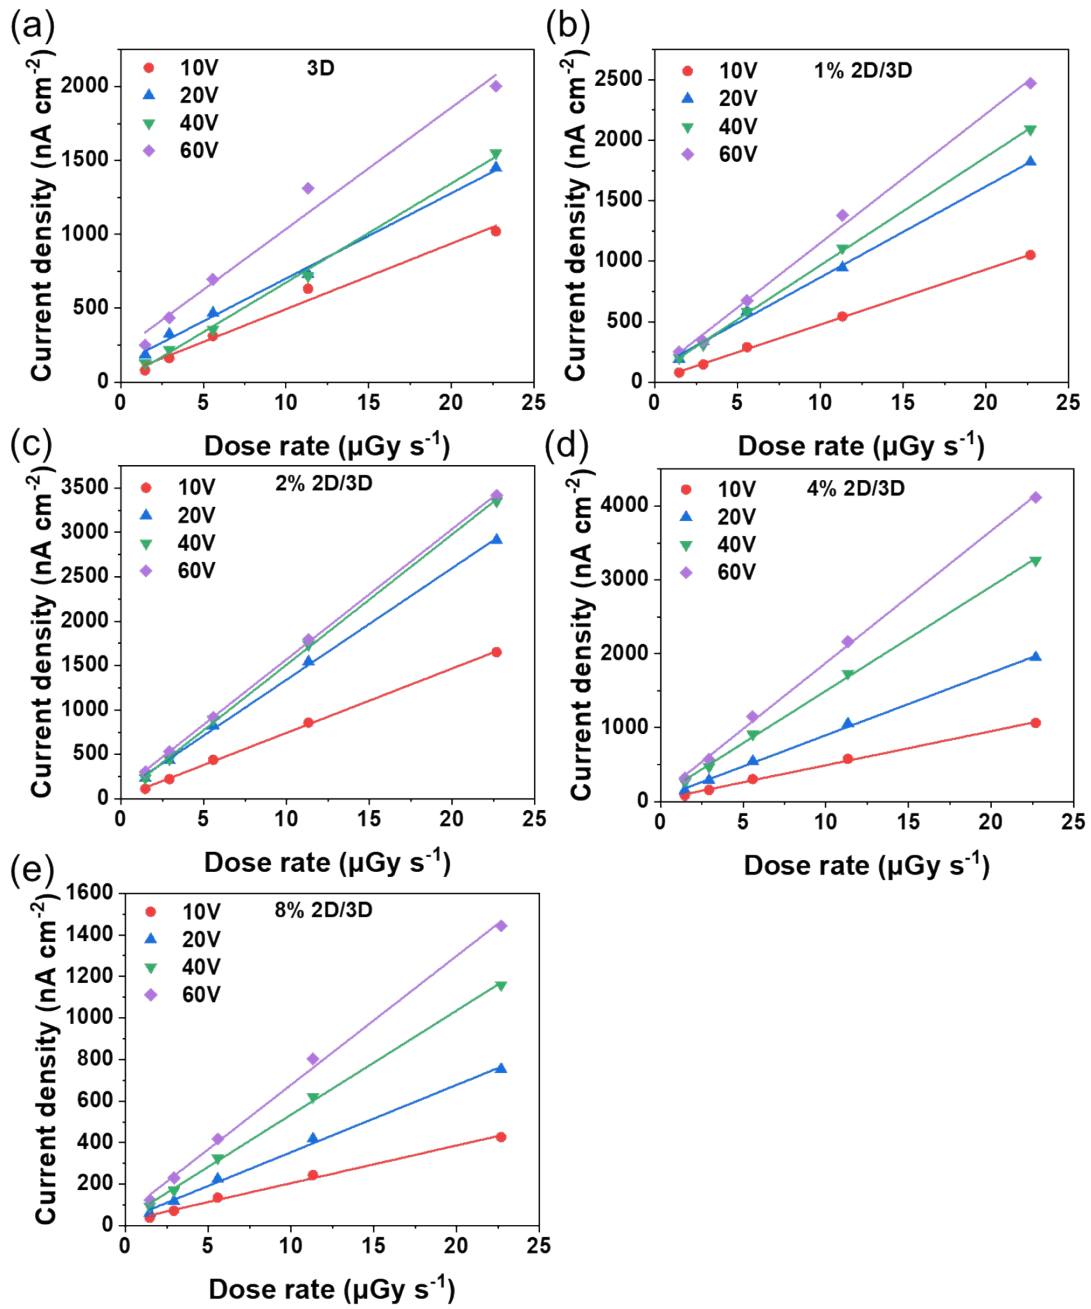

**Fig. S11.** Summary of response currents under different bias voltages and X-ray dose rates. (a) 3D, (b) 1% 2D/3D, (c) 2% 2D/3D, (d) 4% 2D/3D, and (e) 8% 2D/3D wafers.

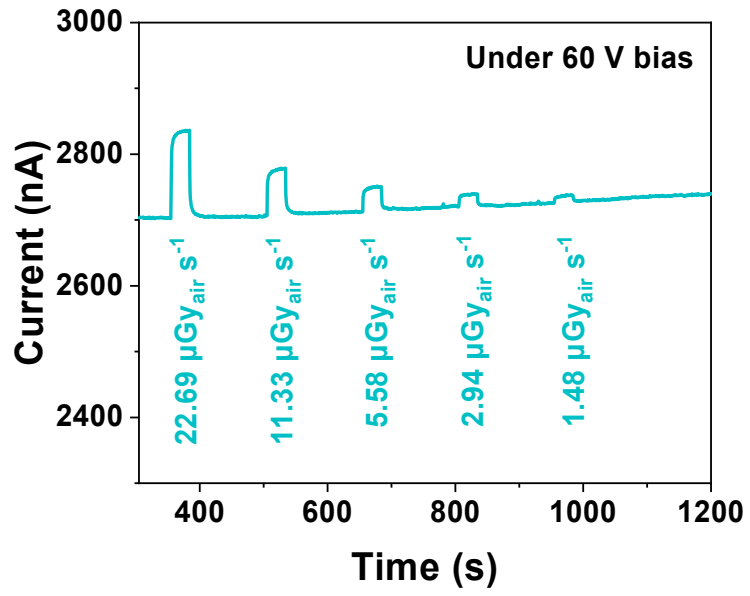

Fig. S12. 4% 2D/3D pellet response current and current drift at 60 V bias voltage.

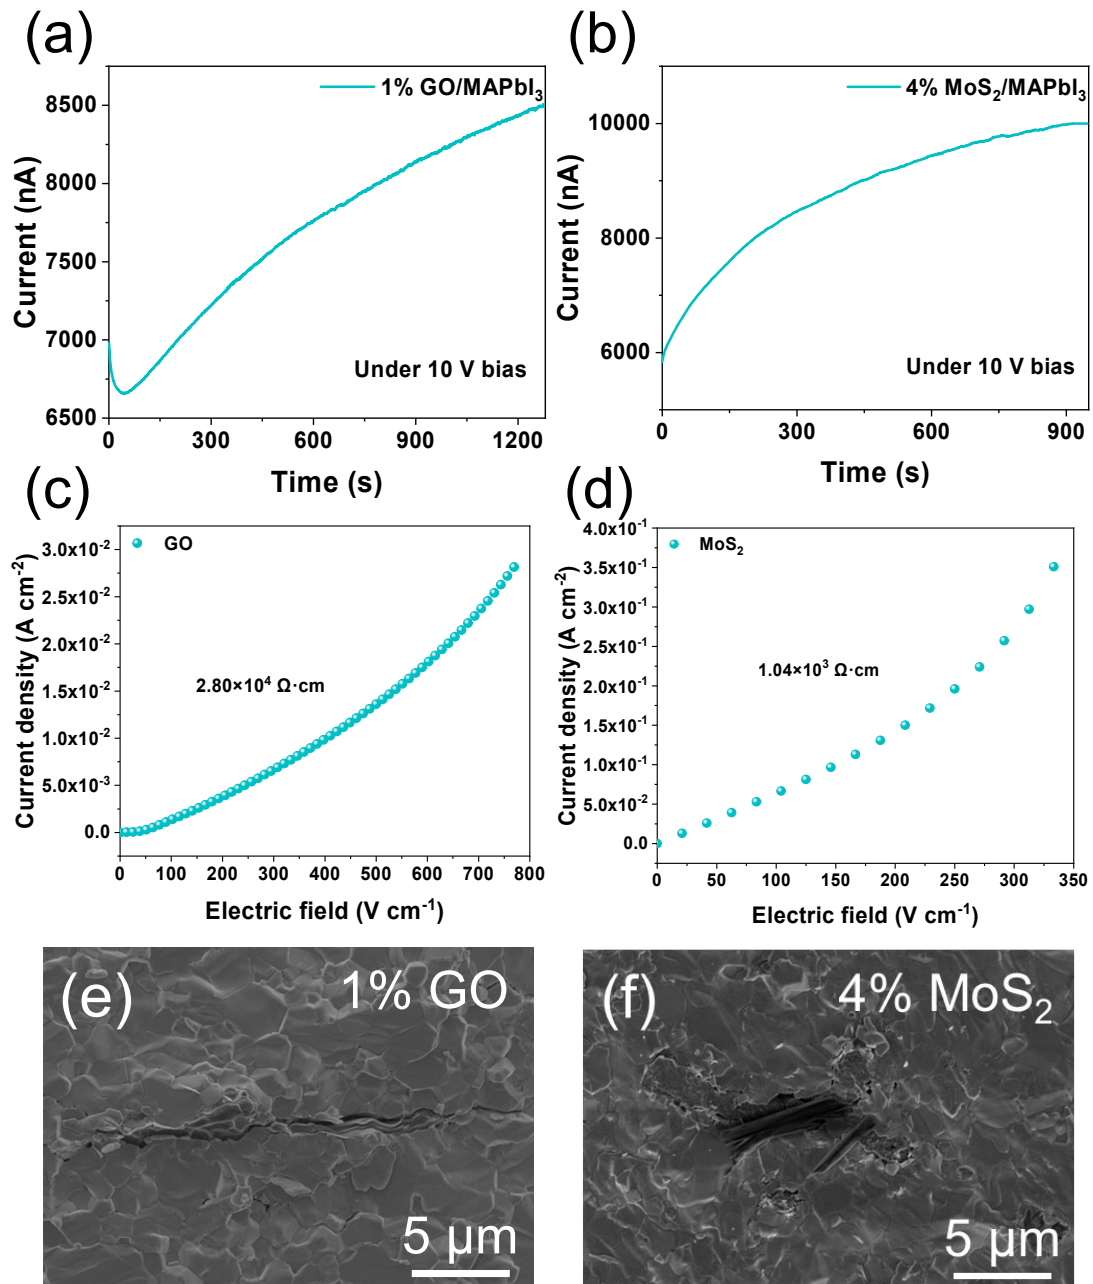

**Fig. S13.** Current-time curves for different 2D/3D mixed wafers at 10V bias. (a) 1% GO/MAPbI<sub>3</sub>. (b) 4% MoS<sub>2</sub>/MAPbI<sub>3</sub>. Resistivities of the 1% GO/MAPbI<sub>3</sub> wafer (c), and 4% MoS<sub>2</sub>/MAPbI<sub>3</sub> wafer (d). The cross-sectional microstructure of the pellets. Scanning electron microscopy (SEM) images of the 1% GO/MAPbI<sub>3</sub> pellet (e), and 4% MoS<sub>2</sub>/MAPbI<sub>3</sub> pellet (f).

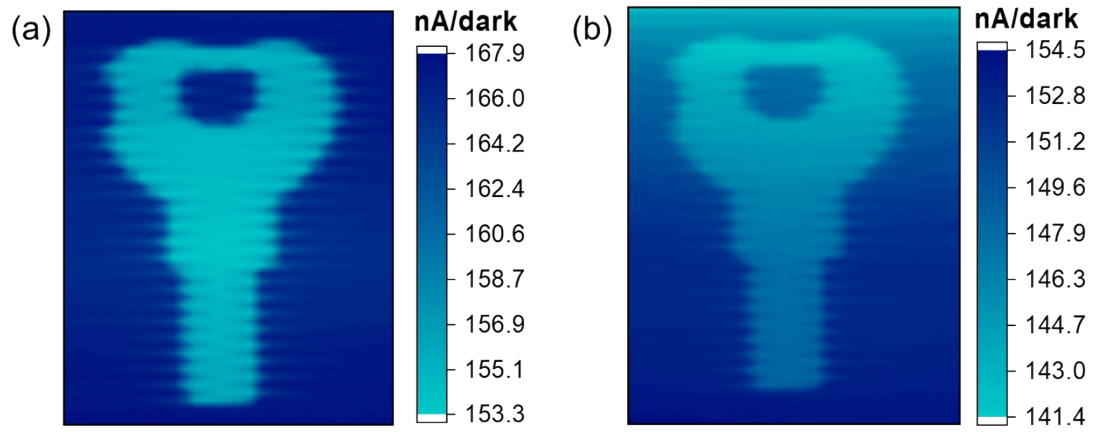

**Fig. S14.** X-ray image of the key obtained with a bias voltage of 10 V. (a) Dose rate of 11.57  $\mu\text{Gy}_{\text{air}} \text{ s}^{-1}$ . (b) Dose rate of 5.698  $\mu\text{Gy}_{\text{air}} \text{ s}^{-1}$ .

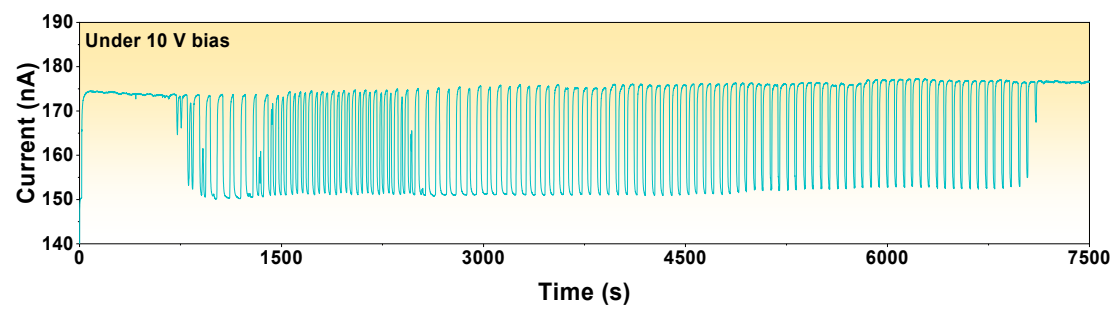

Fig. S15. The current-time curve of the imaging process.



**Table S1.** Summary of the dark current drift for reported perovskite-based X-ray or  $\gamma$ -ray detectors under different applied electric fields.

| Materials                                                                                                         | Applied electric field<br>(V cm <sup>-1</sup> ) | Dark current drift<br>(nA cm <sup>-1</sup> s <sup>-1</sup> V <sup>-1</sup> ) | References |
|-------------------------------------------------------------------------------------------------------------------|-------------------------------------------------|------------------------------------------------------------------------------|------------|
| 3D MAPbI <sub>3</sub> single crystal                                                                              | 100                                             | 1.4×10 <sup>-4</sup>                                                         | 1          |
| 3D MAPbBr <sub>3</sub> single crystal                                                                             | 20                                              | 1.2×10 <sup>-3</sup>                                                         | 2          |
| 3D CsPbBr <sub>3</sub> single crystal                                                                             | 2000                                            | 1.9×10 <sup>-4</sup>                                                         | 3          |
| 3D MAPbI <sub>3</sub> crystal with DPSI                                                                           | 270                                             | 1.2×10 <sup>-5</sup>                                                         | 4          |
| 2D (PEA) <sub>2</sub> MA <sub>3</sub> Pb <sub>4</sub> I <sub>13</sub> -3D MAPbI <sub>3</sub><br>double-layer film | 333                                             | 1.88×10 <sup>-2</sup>                                                        | 5          |
| 3D MAPbI <sub>3</sub> film with PbI <sub>2</sub> -DMSO<br>powders                                                 | 166.7                                           | 1.31×10 <sup>-4</sup>                                                        | 6          |
| 2D BA <sub>2</sub> PbI <sub>4</sub> -3D MAPbI <sub>3</sub> bulk<br>heterostructure pellet                         | 125                                             | 4.84×10 <sup>-5</sup>                                                        | 7          |
| BiOBr passivated 3D Cs <sub>2</sub> AgBiBr <sub>6</sub> film                                                      | 5000                                            | 7.4×10 <sup>-5</sup>                                                         | 8          |
| 2D (F-PEA) <sub>2</sub> PbI <sub>4</sub> single crystal                                                           | 1333                                            | 4.9×10 <sup>-8</sup>                                                         | 9          |
| 2D (BDA)PbI <sub>4</sub> single crystal                                                                           | 4545                                            | 6.06×10 <sup>-9</sup>                                                        | 10         |
| 4% 2D <i>g</i> -C <sub>3</sub> N <sub>4</sub> -3D MAPbI <sub>3</sub> bulk<br>heterostructure pellet               | 126.6                                           | 4.02×10 <sup>-4</sup>                                                        | This work  |
| 8% 2D <i>g</i> -C <sub>3</sub> N <sub>4</sub> -3D MAPbI <sub>3</sub> bulk<br>heterostructure pellet               | 126.6                                           | 4.87×10 <sup>-5</sup>                                                        | This work  |
| 3D MAPbI <sub>3</sub> polycrystalline pellet                                                                      | 126.6                                           | 1.13×10 <sup>-2</sup>                                                        | This work  |

**Table S2.** Summary of the sensitivity and *LoD* for reported perovskite-based X-ray detectors under different applied electric fields.

| Materials                                                                                                         | Applied electric field<br>(V cm <sup>-1</sup> ) | Sensitivity<br>( $\mu\text{C Gy}_{\text{air}}^{-1} \text{cm}^{-2}$ ) | Detection limit<br>(nGy <sub>air</sub> s <sup>-1</sup> ) | References |
|-------------------------------------------------------------------------------------------------------------------|-------------------------------------------------|----------------------------------------------------------------------|----------------------------------------------------------|------------|
| 3D MAPbI <sub>3</sub> wafer                                                                                       | 2000                                            | $2.5 \times 10^3$                                                    | N/A                                                      | 11         |
| 3D MAPbI <sub>3</sub> film                                                                                        | 2400                                            | $1.1 \times 10^4$                                                    | N/A                                                      | 12         |
| 3D MAPbI <sub>3</sub> single crystal                                                                              | 1000                                            | $7.1 \times 10^5$                                                    | 1.5                                                      | 13         |
| 3D MAPbI <sub>3</sub> crystal with DPSI                                                                           | 417                                             | $2.9 \times 10^6$                                                    | 5.7                                                      | 4          |
| 3D MAPbI <sub>3</sub> microcrystalline                                                                            | 1700                                            | $9.3 \times 10^3$                                                    | N/A                                                      | 14         |
| 2D (PEA) <sub>2</sub> MA <sub>3</sub> Pb <sub>4</sub> I <sub>13</sub> -3D<br>MAPbI <sub>3</sub> double-layer film | 333                                             | $1.9 \times 10^4$                                                    | 480                                                      | 5          |
| 3D MAPbI <sub>3</sub> film with PbI <sub>2</sub> -<br>DMSO powders                                                | 500                                             | $1.6 \times 10^4$                                                    | 410                                                      | 6          |
| 2D BA <sub>2</sub> PbI <sub>4</sub> -3D MAPbI <sub>3</sub> bulk<br>heterostructure pellet                         | 125                                             | $2.0 \times 10^3$                                                    | 111.76                                                   | 7          |
| 4% 2D <i>g</i> -C <sub>3</sub> N <sub>4</sub> -3D MAPbI <sub>3</sub> bulk<br>heterostructure pellet               | 759.4                                           | $1.8 \times 10^5$                                                    | 27                                                       | This work  |

## References

1. S. Yakunin, D. N. Dirin, Y. Shynkarenko, V. Morad, I. Cherniukh, O. Nazarenko, D. Kreil, T. Nauser and M. V. Kovalenko, *Nat. Photonics*, 2016, **10**, 585-589.
2. W. Wei, Y. Zhang, Q. Xu, H. T. Wei, Y. J. Fang, Q. Wang, Y. H. Deng, T. Li, A. Gruverman, L. Cao and J. S. Huang, *Nat. Photonics*, 2017, **11**, 315.
3. Y. H. He, L. Matei, H. J. Jung, K. M. McCall, M. Chen, C. C. Stoumpos, Z. F. Liu, J. A. Peters, D. Y. Chung, B. W. Wessels, M. R. Wasielewski, V. P. Dravid, A. Burger and M. G. Kanatzidis, *Nat. Commun.*, 2018, **9**, 1609.
4. Y. Liu, X. P. Zheng, Y. J. Fang, Y. Zhou, Z. Y. Ni, X. Xiao, S. S. Chen and J. S. Huang, *Nat. Commun.*, 2021, **12**, 1686.
5. X. Xu, W. Qian, J. Wang, J. Yang, J. Chen, S. Xiao, Y. Ge and S. Yang, *Adv. Sci.*, 2021, **8**, 2102730.
6. W. J. Liu, T. Y. Shi, J. T. Zhu, Z. Y. Zhang, D. Li, X. C. He, X. S. Fan, L. Q. Meng, J. H. Wang, R. He, Y. S. Ge, Y. L. Liu, P. K. Chu and X. F. Yu, *Adv. Sci.*, 2023, **10**, 2204512.
7. Y. Xiao, C. Xue, X. Wang, Y. Liu, Z. Yang and S. Liu, *ACS Appl. Mater. Interfaces*, 2022, **14**, 54867-54875.
8. B. Yang, W. C. Pan, H. D. Wu, G. D. Niu, J. H. Yuan, K. H. Xue, L. X. Yin, X. Y. Du, X. S. Miao, X. Q. Yang, Q. G. Xie and J. Tang, *Nat. Commun.*, 2019, **10**, 1989.
9. H. Y. Li, J. M. Song, W. T. Pan, D. R. Xu, W. A. Zhu, H. T. Wei and B. Yang, *Adv. Mater.*, 2020, **32**, 2003790.
10. Y. Shen, Y. Liu, H. Ye, Y. Zheng, Q. Wei, Y. Xia, Y. Chen, K. Zhao, W. Huang and S. Liu, *Angew. Chem. Int. Ed.*, 2020, **59**, 14896-14902.
11. S. Shrestha, R. Fischer, G. J. Matt, P. Feldner, T. Michel, A. Osvet, I. Levchuk, B. Merle, S. Golkar, H. W. Chen, S. F. Tedde, O. Schmidt, R. Hock, M. Ruhrig, M. Goken, W. Heiss, G. Anton and C. J. Brabec, *Nat. Photonics*, 2017, **11**, 436.
12. Y. C. Kim, K. H. Kim, D. Y. Son, D. N. Jeong, J. Y. Seo, Y. S. Choi, I. T. Han, S. Y. Lee and N. G. Park, *Nature*, 2017, **550**, 87.
13. Y. L. Song, L. Q. Li, W. H. Bi, M. W. Hao, Y. F. Kang, A. R. Wang, Z. S. Wang, H. M. Li, X. H. Li, Y. J. Fang, D. R. Yang and Q. F. Dong, *Research*, 2020, **2020**, 5958243.
14. S. Deumel, A. van Breemen, G. Gelinck, B. Peeters, J. Maas, R. Verbeek, S. Shanmugam, H. Akkerman, E. Meulenkamp, J. E. Huerdler, M. Acharya, M. Garcia-Batlle, O. Almora, A. Guerrero, G. Garcia-Belmonte, W. Heiss, O. Schmidt and S. F. Tedde, *Nat. Electron.*, 2021, **4**, 681-688.
